# Supplementary material for: Using a Riboswitch Sensor to Detect Co2+/Ni2+ Transport in E. coli
Source: PubMed Central journal article supplement (PMC7917058; doi:10.3389/fchem.2021.631909), 2021-02-15
Supplement: datasheet1.pdf [file datasheet1.pdf]

## *Supplementary Material*

### 1 **Construction of the whole-Cell Sensor**

2 As shown in the **Supplementary Figure 1**, the pSB1A2 was used as the basic backbone  
3 for recombinant plasmid construction. Terminator gene (*Ter*) was amplified by PCR  
4 and digested using *XbaI*, *SpeI* and ligated into pSB1A2 between *XbaI* and *SpeI*. After  
5 confirmed by sequencing, the resulting plasmid was named pSB1A2-*Ter*. The gene  
6 encoding mCherry was cloned into pSBC2A-*Ter* by Biobrick, *mCherry* was amplified  
7 with a forward primer that contained two restriction sites *EcoRI*, *XbaI* and a reverse  
8 primer that contained a *SpeI* restriction site, the fragment was digested with *EcoRI* and  
9 *SpeI* and ligated into pSB1A2-*Ter* between *EcoRI* and *XbaI*. The resulting plasmid was  
10 named pSB1A2-mCherry-*Ter*. All NiCo riboswitch (CoNi riboswitch used here are  
11 given in **Supplementary Table 1**) fragments containing conservative promoter pCons  
12 and RBS were synthesized by GenScript. Then pCons-NiCo riboswitch-RBS was  
13 cloned into pSB1A2-mCherry-*Ter* by Biobrick by following the same steps mentioned  
14 above. The resulting plasmid was named pSB1A2-pCons-NiCo riboswitch-RBS-  
15 mCherry-*Ter*.

16 All restriction enzymes described above used QuickCut restriction enzymes from  
17 TaKaRa. All ligations were performed using T4 DNA ligase from Fermentas. PCR  
18 reactions were performed using Taq DNA Polymerase (TaKaRa). Reactions were  
19 carried out essentially according to supplier. All plasmidswere confirmed by  
20 sequencing (GenScript).

21

22

23

24

25

26

27

28

29 **Supplementary Table 1** CoNi riboswitch source and detailed sequence

| Gene name | Gene source                          | Sequence                                                                                                                                           |
|-----------|--------------------------------------|----------------------------------------------------------------------------------------------------------------------------------------------------|
| Ribo1     | <i>Clostridium botulinum</i>         | GGGGTACAAACTGATCAGGCCGATAAATT<br>ATTTGATTTATGGAGCCGGGCCATTTTTGT<br>GGCAACAGGATATTTAATACCTGTGGGAC<br>AGTATAT                                        |
| Ribo2     | <i>Erysipelotrichaceae bacterium</i> | GGGGTACAAACTGAGCAGGCCAAATGACC<br>AGAGCGGTCATGCAGCCGGGCTGCGAAA<br>GCGGCAACAGATGATTACACGCACATCT<br>GTGGGACAGTTGTATATTCCACAGATGTT<br>TTTT             |
| Ribo3     | <i>Clostridium cellulolyticum</i>    | GGGAGTACAAACTGAGCAGGCGATGGAC<br>CTTTCATAGAGGTACATGGGGCCGGGCCA<br>CCCAGTGAGTGGCAGCAGATTGCAATCA<br>TGCACATCTGTGGGACAGTAGTATGTTCC<br>ACGGGTGTGCTTTTTT |

30 **Construction of mutant strain**

31 Genes were deleted by the insertion of Kan<sup>r</sup> cassettes using the  $\lambda$  Red-recombinase  
32 system refer to a previously published protocol(Datsenko and Wanner 2000). The  
33 recombinant plasmid pUC57-Kan containing Kan<sup>r</sup> gene and homologous sequences of  
34 target genes was constructed (As shown in the **Supplementary Figure 2**). A linearized  
35 DNA flanked by homologous sequences for gene deletion was obtained by PCR, PCR  
36 products were purified, digested with *DpnI*, repurified and suspended in ddH<sub>2</sub>O and  
37 then transformed into *Escherichia coli* K12 strain containing plasmid pKD46.  
38 Catalyzed by  $\lambda$  Red-recombinase system, target gene was knocked out while Kan<sup>r</sup> was  
39 knocked in. Electroporation-competent cells containing plasmid pKD46 were prepared.  
40 Electroporation of linear homologous fragment was done by using a MicroPulser  
41 (BioRad), 1.8kV, 1 pulse, 0.1 cm cuvette. Shocked cells were added to 1 ml SOC,  
42 incubated 1 h at 37 °C, the products were coated onto agar to select kanamycin  
43 transformant and confirmed by PCR (As shown in the **Supplementary Figure 3**).  
44 pKD46 was a temperature-sensitive plasmid, which was lost automatically when the  
45 culture condition was higher than 42 °C.

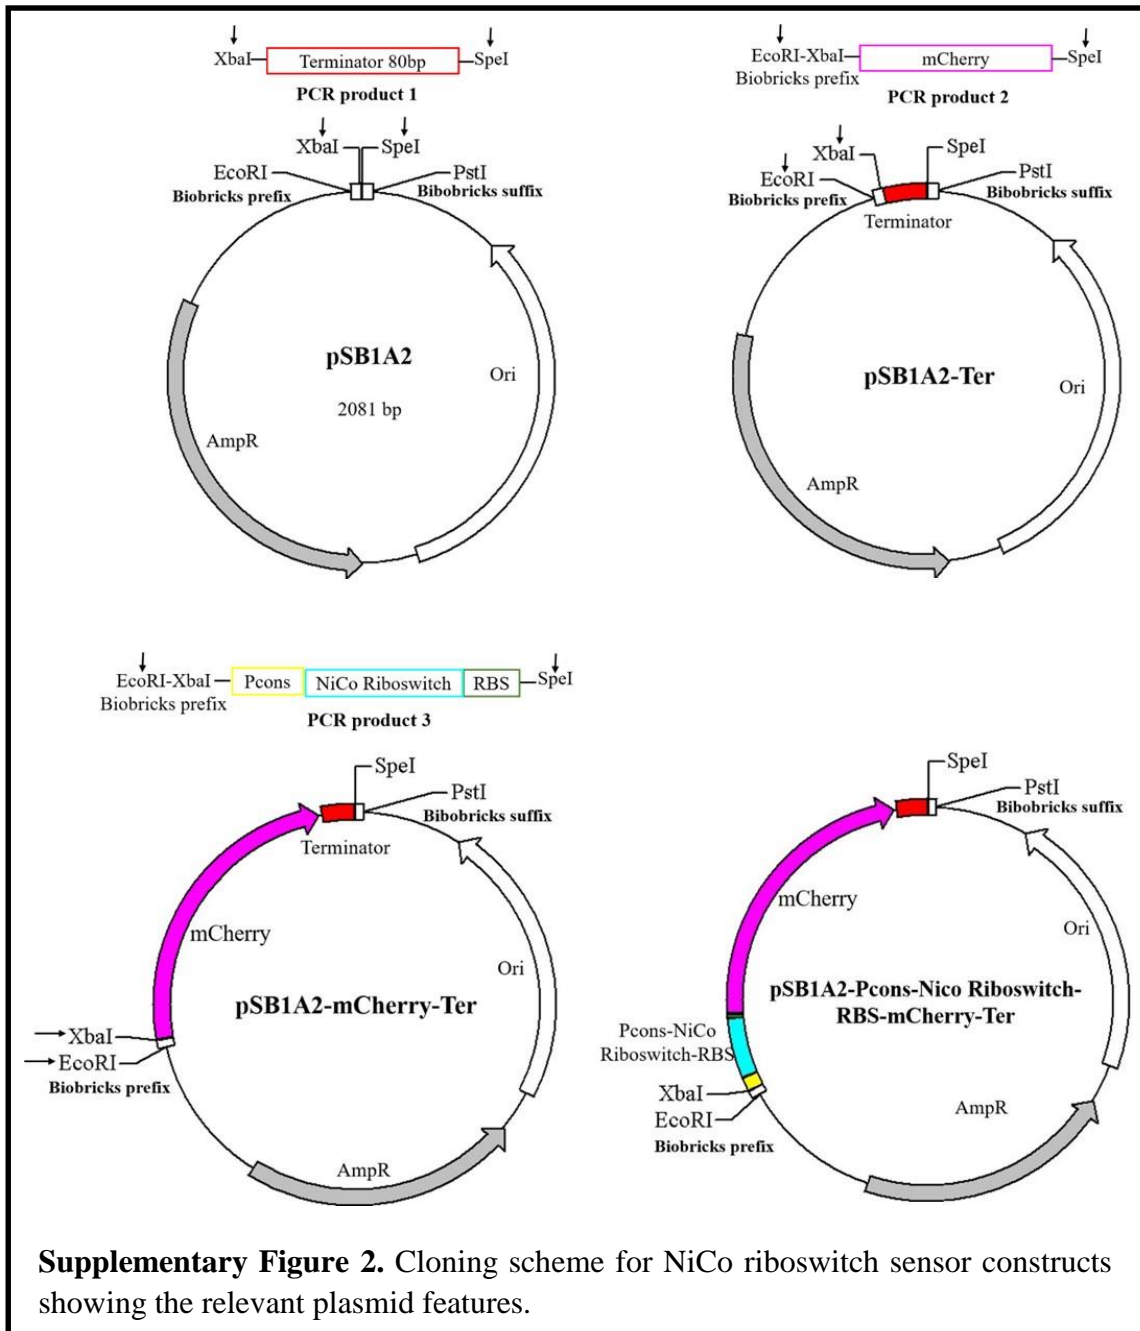

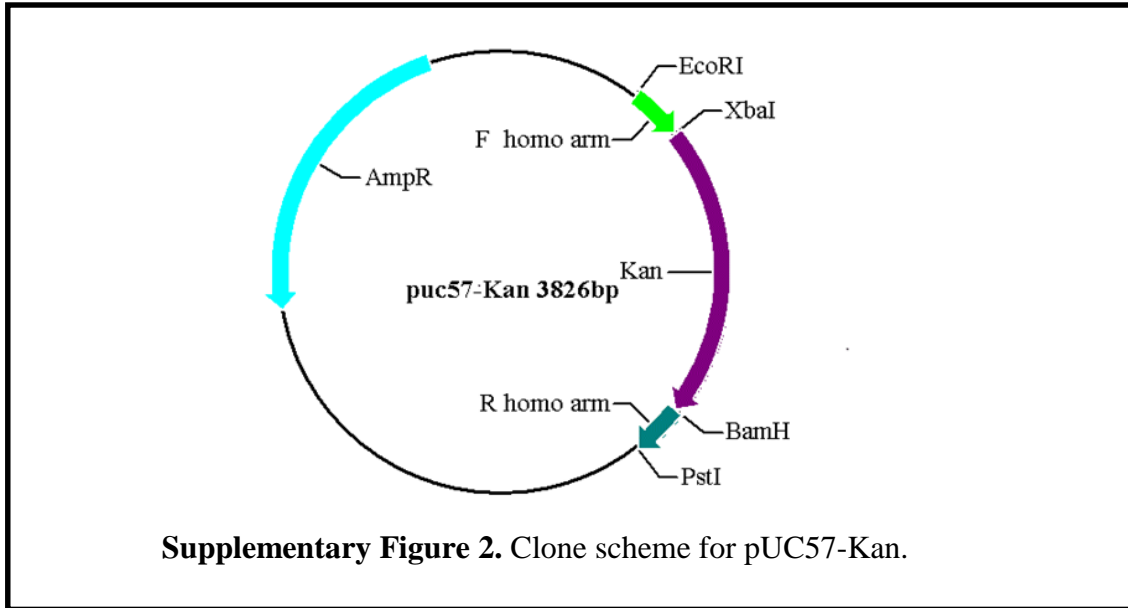

48

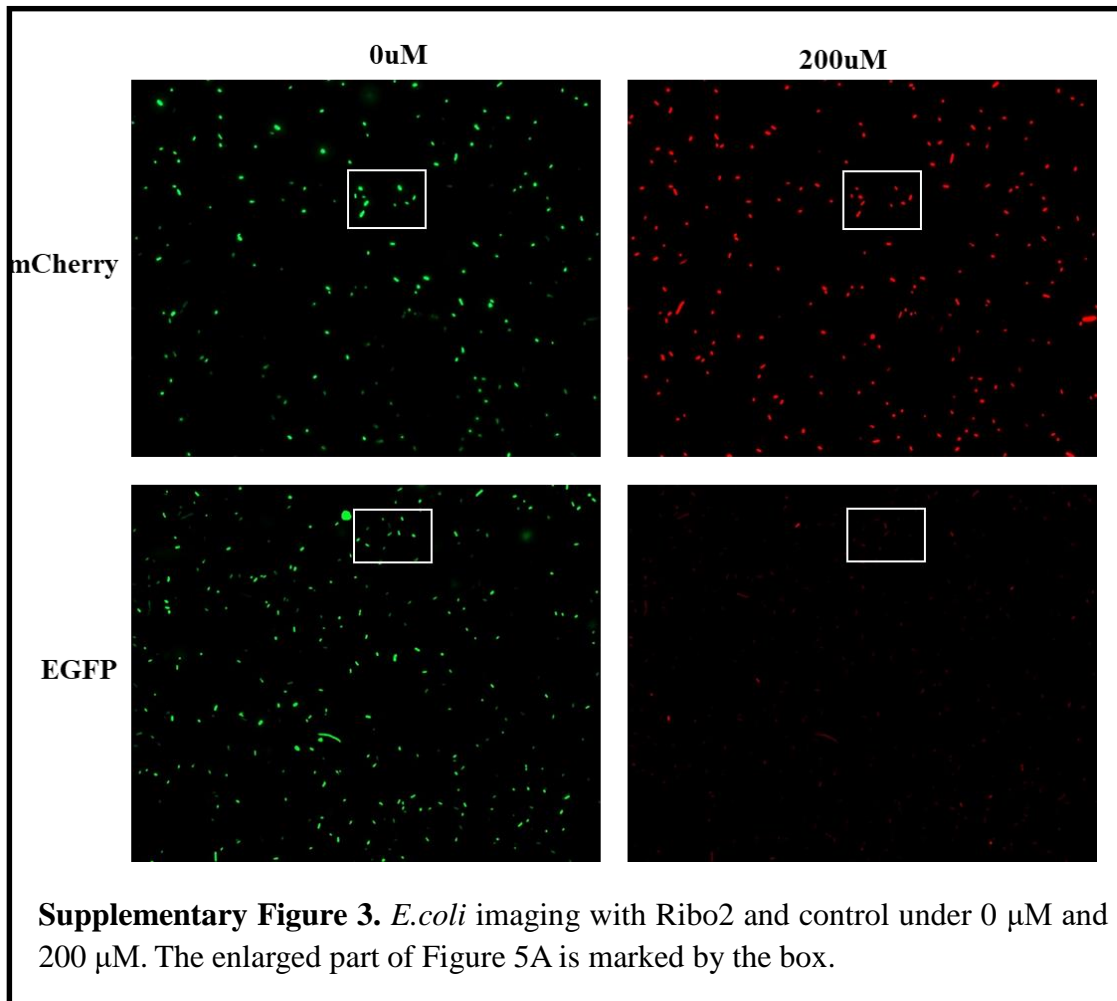

49

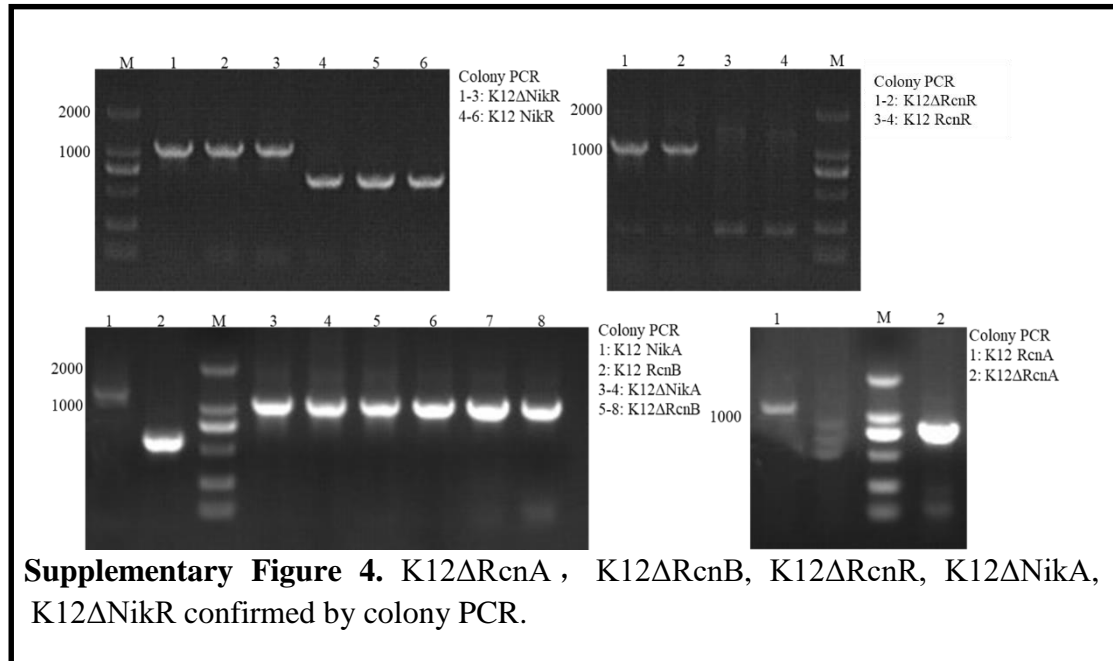

50 **REFERENCES**

51 Datsenko, K. A., and B. L. Wanner. 2000. "One-step inactivation of chromosomal genes in Escherichia  
 52 coli K-12 using PCR products." *Proceedings of the National Academy of Sciences of the*  
 53 *United States of America* no. 97 (12):6640-6645. doi: 10.1073/pnas.120163297.  
 54
